# Supplementary material for: Analysis of the T Cell Response to Zika Virus and Identification of a Novel CD8+ T Cell Epitope in Immunocompetent Mice
Source: PubMed Central journal article supplement (PMC5322871; doi:10.1371/journal.ppat.1006184), 2017-02-23

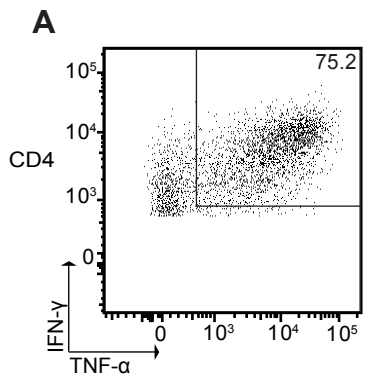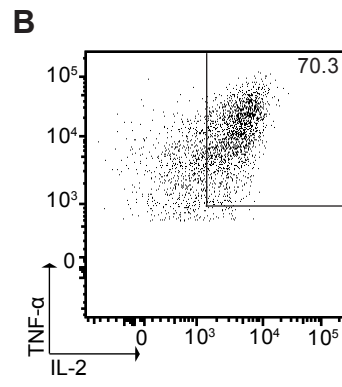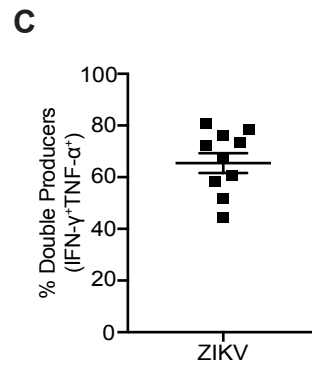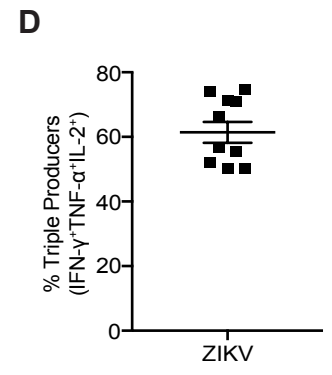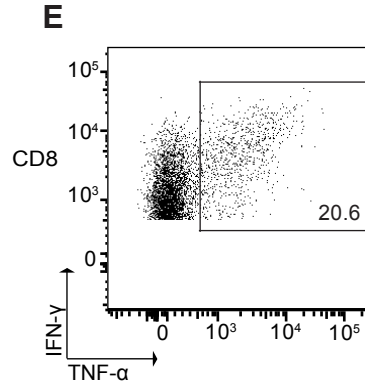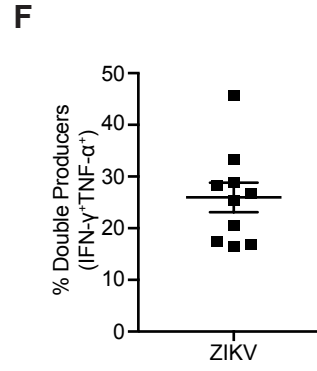

Supplement: ppat.1006184.s006.pdf [file ppat.1006184.s006.pdf]
